# Supplementary material for: Sucrose Promotes Strawberry Fruit Ripening and Affects Ripening-Related Processes
Source: Int J Genomics. 2019 Nov 20;2019:9203057. doi: 10.1155/2019/9203057 (PMC6886322; doi:10.1155/2019/9203057)
Supplement: Supplementary Materials — Table S1: list of genes involved in ripening-related processes affected by sucrose. [file 9203057.f1.xlsx]

## Sheet: Sheet1
Table S1. List of genes involved in ripening-related processes affected by sucrose.
Pathways	Genes	Descriptions	Gene IDs	CK8_readcount	Suc8_readcount	log2FoldChange(control/sucrose-treated)	pval	padj	significant
Ascorbic acid biosynthesis	AO	PREDICTED: L-ascorbate oxidase homolog [Pyrus x bretschneideri]	Cluster-12337.68511	323.239	91.5205	1.8204	3.5759e-22	1.4972e-19	TRUE
		PREDICTED: L-ascorbate oxidase homolog [Pyrus x bretschneideri]	Cluster-12337.89450	323.594	120.437	1.4259	1.0274e-15	2.8677e-13	TRUE
	GST	PREDICTED: glutathione S-transferase F11-like [Prunus mume]	Cluster-12337.59668	804.071	2872.26	-1.8368	4.4125e-166	2.8679e-162	TRUE
		PREDICTED: glutathione S-transferase F11-like [Fragaria vesca subsp. vesca]	Cluster-12337.67044	31.1122	91.4593	-1.5556	6.5528e-06	0.00056428	TRUE
		PREDICTED: glutathione S-transferase F11-like [Fragaria vesca subsp. vesca]	Cluster-12337.69936	83.9946	251.046	-1.5796	2.7698e-14	6.8737e-12	TRUE
		PREDICTED: glutathione S-transferase F11-like [Fragaria vesca subsp. vesca]	Cluster-12337.79205	707.576	2119.8	-1.583	2.1991e-97	6.525e-94	TRUE
		PREDICTED: probable glutathione S-transferase [Fragaria vesca subsp. vesca]	Cluster-12337.80939	514.698	1068.63	-1.054	1.0435e-28	5.9845e-26	TRUE
	MIOX	PREDICTED: inositol oxygenase 1-like [Fragaria vesca subsp. vesca]	Cluster-12337.56320	249.993	89.5665	1.4809	6.0209e-13	1.3428e-10	TRUE
		PREDICTED: inositol oxygenase 4 [Fragaria vesca subsp. vesca]	Cluster-12337.72204	817.022	376.253	1.1187	7.535e-25	3.6995e-22	TRUE
	GGP	PREDICTED: GDP-L-galactose phosphorylase 1-like isoform X1 [Fragaria vesca subsp. vesca]	Cluster-12337.97143	46.2485	7.8799	2.5532	2.0818e-05	0.001599	TRUE
	PME	PREDICTED: pectinesterase-like [Fragaria vesca subsp. vesca]	Cluster-12337.48342	639.053	1721.95	-1.43	4.9529e-65	7.1917e-62	TRUE
		PREDICTED: pectinesterase-like [Fragaria vesca subsp. vesca]	Cluster-12337.70124	94.6135	339.167	-1.8419	2.295e-23	1.027e-20	TRUE
	PG	PREDICTED: polygalacturonase-like [Fragaria vesca subsp. vesca]	Cluster-12337.69051	69.9193	28.4078	1.2994	0.00078037	0.036179	TRUE
		PREDICTED: probable polygalacturonase [Malus domestica]>gi|658036909|ref|XP_008354013.1| PREDICTED: probable polygalacturonase [Malus domestica]	Cluster-12337.85817	17.0341	930.967	-5.7722	4.5157e-229	6.8483e-225	TRUE
		PREDICTED: polygalacturonase At1g48100 [Fragaria vesca subsp. vesca]	Cluster-12337.89783	62.9472	163.941	-1.381	3.2053e-08	4.1002e-06	TRUE
	GalUR	PREDICTED: probable aldo-keto reductase 1 [Fragaria vesca subsp. vesca]	Cluster-12337.79881	86.4321	207.574	-1.264	6.3487e-09	8.8242e-07	TRUE
	RDR	PREDICTED: ribonucleoside-diphosphate reductase large subunit [Fragaria vesca subsp. vesca]	Cluster-12337.71122	1632.99	3277.39	-1.005	7.8312e-70	1.2725e-66	TRUE
		PREDICTED: ribonucleoside-diphosphate reductase large subunit [Fragaria vesca subsp. vesca]	Cluster-12337.71123	422.171	869.775	-1.0428	2.395e-23	1.0683e-20	TRUE
		PREDICTED: ribonucleoside-diphosphate reductase small chain [Populus euphratica]	Cluster-12337.79997	69.923	241.5	-1.7882	1.5076e-16	4.4539e-14	TRUE
		PREDICTED: ribonucleoside-diphosphate reductase small chain [Populus euphratica]	Cluster-12337.80691	115.983	265.816	-1.1965	3.1227e-10	5.1977e-08	TRUE
Auxin signaling	AUX1	PREDICTED: auxin transporter-like protein 2 [Fragaria vesca subsp. vesca]	Cluster-12337.81775	155.308	57.4547	1.4346	2.1385e-05	0.0016389	TRUE
		PREDICTED: auxin transporter-like protein 2 [Fragaria vesca subsp. vesca]	Cluster-12337.74318	479.374	178.918	1.4218	1.8871e-22	7.9742e-20	TRUE
	AUX/IAA	PREDICTED: auxin-responsive protein IAA4-like [Fragaria vesca subsp. vesca]	Cluster-12337.76254	367.917	180.694	1.0258	9.656e-11	1.7138e-08	TRUE
	GH3	PREDICTED: indole-3-acetic acid-amido synthetase GH3.6 [Fragaria vesca subsp. vesca]	Cluster-12337.95311	133.589	59.5096	1.1666	1.0708e-05	0.00087728	TRUE
Abcisic acid signalng	PYR/PYL	PREDICTED: abscisic acid receptor PYL11-like [Fragaria vesca subsp. vesca]	Cluster-12337.43020	60.5604	190.006	-1.6496	6.3239e-12	1.2769e-09	TRUE
	PP2C	PREDICTED: probable protein phosphatase 2C 25 [Fragaria vesca subsp. vesca]	Cluster-12337.106874	601.477	198.94	1.5962	4.0399e-33	2.6638e-30	TRUE
		PREDICTED: probable protein phosphatase 2C 78 isoform X1 [Fragaria vesca subsp. vesca]	Cluster-12337.49591	45.4904	4.36117	3.3828	2.2992e-05	0.0017405	TRUE
		PREDICTED: probable protein phosphatase 2C 55 [Fragaria vesca subsp. vesca]>gi|764546439|ref|XP_011459565.1| PREDICTED: probable protein phosphatase 2C 55 [Fragaria vesca subsp. vesca]	Cluster-12337.51346	62.8369	135.157	-1.105	0.00030551	0.016653	TRUE
		PREDICTED: probable protein phosphatase 2C 25 [Fragaria vesca subsp. vesca]	Cluster-12337.53172	229.843	92.6495	1.3108	1.7794e-10	3.0473e-08	TRUE
		PREDICTED: probable protein phosphatase 2C 25 [Fragaria vesca subsp. vesca]	Cluster-12337.95024	502.074	182.153	1.4628	3.9967e-24	1.8811e-21	TRUE
Ethylene signaling	ERF	PREDICTED: ethylene-responsive transcription factor ERF017 [Fragaria vesca subsp. vesca]	Cluster-12337.106526	110.992	47.6895	1.2187	2.8815e-05	0.0021259	TRUE
		PREDICTED: ethylene-responsive transcription factor ERF109-like [Fragaria vesca subsp. vesca]	Cluster-12337.116518	68.8208	5.16349	3.7364	2.5123e-13	5.7824e-11	TRUE
		PREDICTED: ethylene-responsive transcription factor 1B [Fragaria vesca subsp. vesca]	Cluster-12337.30470	27.7914	4.46123	2.6391	0.00024347	0.013732	TRUE
		PREDICTED: ethylene-responsive transcription factor ERF017 [Fragaria vesca subsp. vesca]	Cluster-12337.34107	281.183	134.502	1.0639	3.7646e-09	5.4547e-07	TRUE
		PREDICTED: ethylene-responsive transcription factor ERF014 [Fragaria vesca subsp. vesca]	Cluster-12337.37663	39.6647	8.62945	2.2005	9.3697e-05	0.0060467	TRUE
		PREDICTED: ethylene-responsive transcription factor 2 [Fragaria vesca subsp. vesca]	Cluster-12337.40055	234.111	65.9742	1.8272	9.5835e-17	2.8812e-14	TRUE
		PREDICTED: ethylene-responsive transcription factor 2 [Fragaria vesca subsp. vesca]	Cluster-12337.40056	375.015	98.4072	1.9301	6.9097e-28	3.8169e-25	TRUE
		PREDICTED: ethylene-responsive transcription factor 2 [Fragaria vesca subsp. vesca]	Cluster-12337.49256	390.64	87.1665	2.164	6.0577e-34	4.1341e-31	TRUE
		PREDICTED: ethylene-responsive transcription factor 2 [Fragaria vesca subsp. vesca]	Cluster-12337.52541	208.717	58.3374	1.8391	3.1372e-15	8.4289e-13	TRUE
	SIMKK	PREDICTED: mitogen-activated protein kinase kinase kinase NPK1 [Fragaria vesca subsp. vesca]	Cluster-12337.37770	58.1948	22.3053	1.3835	0.00087632	0.039737	TRUE
		PREDICTED: mitogen-activated protein kinase kinase 9-like [Fragaria vesca subsp. vesca]	Cluster-12337.56506	259.996	105.361	1.3031	3.4648e-11	6.496e-09	TRUE
		PREDICTED: mitogen-activated protein kinase kinase kinase 1-like isoform X6 [Fragaria vesca subsp. vesca]	Cluster-12337.57768	45.7192	125.991	-1.4625	4.6563e-07	5.0201e-05	TRUE
		PREDICTED: mitogen-activated protein kinase kinase 9-like [Fragaria vesca subsp. vesca]	Cluster-12337.59538	320.474	149.659	1.0985	1.6252e-10	2.808e-08	TRUE
Brassinoteroid signaling	BKI1	PREDICTED: BRI1 kinase inhibitor 1 [Fragaria vesca subsp. vesca]	Cluster-12337.26189	73.3617	19.1844	1.9351	1.4664e-06	0.00014578	TRUE
	TCH4	PREDICTED: xyloglucan endotransglucosylase/hydrolase 2-like [Fragaria vesca subsp. vesca]	Cluster-12337.122730	35.597	9.52524	1.9019	0.00096137	0.042659	TRUE
		PREDICTED: xyloglucan endotransglucosylase/hydrolase 2-like [Fragaria vesca subsp. vesca]	Cluster-12337.122801	17.8376	1.94831	3.1946	0.00099369	0.04378	TRUE
		PREDICTED: probable xyloglucan endotransglucosylase/hydrolase protein 23 [Fragaria vesca subsp. vesca]	Cluster-12337.31904	162.945	33.7688	2.2706	6.292e-16	1.7881e-13	TRUE
		PREDICTED: xyloglucan endotransglucosylase/hydrolase protein 9 [Fragaria vesca subsp. vesca]	Cluster-12337.45336	261.852	111.829	1.2275	2.5898e-10	4.3478e-08	TRUE
		PREDICTED: xyloglucan endotransglucosylase/hydrolase protein 9 [Fragaria vesca subsp. vesca]	Cluster-12337.55339	85.0266	23.5907	1.8497	4.198e-07	4.562e-05	TRUE
		PREDICTED: xyloglucan endotransglucosylase/hydrolase protein 9 [Fragaria vesca subsp. vesca]	Cluster-12337.63177	3646.87	1399.4	1.3818	2.2594e-129	1.0634e-125	TRUE
		PREDICTED: probable xyloglucan endotransglucosylase/hydrolase protein 6 [Pyrus x bretschneideri]	Cluster-12337.67832	3290.62	1559.12	1.0776	1.4042e-68	2.203e-65	TRUE
		PREDICTED: probable xyloglucan endotransglucosylase/hydrolase protein 23 [Fragaria vesca subsp. vesca]	Cluster-12337.71030	1580.07	484.676	1.7049	1.9976e-87	4.6213e-84	TRUE
Jasmonic acid signaling	COI1	PREDICTED: coronatine-insensitive protein 1 [Fragaria vesca subsp. vesca]>gi|764633509|ref|XP_011469891.1| PREDICTED: coronatine-insensitive protein 1 [Fragaria vesca subsp. vesca]	Cluster-12337.91587	39.0755	117.095	-1.5833	0.00019637	0.011405	TRUE
	JAZ	PREDICTED: protein TIFY 9 [Fragaria vesca subsp. vesca]	Cluster-12337.108394	55.8377	13.9517	2.0008	1.1862e-05	0.00096484	TRUE
		PREDICTED: protein TIFY 5A [Fragaria vesca subsp. vesca]	Cluster-12337.36230	110.269	38.4669	1.5193	8.8668e-07	9.0383e-05	TRUE
		PREDICTED: protein TIFY 5A [Fragaria vesca subsp. vesca]	Cluster-12337.36231	62.2127	21.4283	1.5377	0.00018284	0.010725	TRUE
		PREDICTED: protein TIFY 11A-like [Fragaria vesca subsp. vesca]	Cluster-12337.77357	612.136	160.676	1.9297	2.7835e-42	2.3597e-39	TRUE
		PREDICTED: protein TIFY 11A-like [Fragaria vesca subsp. vesca]	Cluster-12337.84262	859.807	199.604	2.1069	2.7625e-68	4.2366e-65	TRUE
		PREDICTED: protein TIFY 11A-like [Fragaria vesca subsp. vesca]	Cluster-12337.89801	1365.18	334.927	2.0272	3.6185e-100	1.1759e-96	TRUE
		PREDICTED: protein TIFY 6B [Fragaria vesca subsp. vesca]	Cluster-12337.95153	39.6228	8.85804	2.1613	0.00016903	0.010027	TRUE
		PREDICTED: protein TIFY 9 [Fragaria vesca subsp. vesca]	Cluster-12337.99643	56.5042	12.3289	2.1963	3.3401e-06	0.00030741	TRUE
	MYC2	PREDICTED: transcription factor MYC2-like [Fragaria vesca subsp. vesca]	Cluster-12337.50909	211.865	85.8603	1.3031	1.5375e-09	2.3519e-07	TRUE
		PREDICTED: transcription factor MYC2-like [Fragaria vesca subsp. vesca]	Cluster-12337.76767	884.926	335.588	1.3989	4.1437e-38	3.1774e-35	TRUE
Salicylic acid signal transduction	NPR1	PREDICTED: LOW QUALITY PROTEIN: regulatory protein NPR5-like [Fragaria vesca subsp. vesca]	Cluster-12337.35374	33.9663	79.7816	-1.232	0.00044949	0.023099	TRUE
		PREDICTED: LOW QUALITY PROTEIN: regulatory protein NPR5-like [Fragaria vesca subsp. vesca]	Cluster-12337.75366	69.3296	187.198	-1.433	9.5678e-10	1.5132e-07	TRUE
	PR-1	PREDICTED: basic form of pathogenesis-related protein 1-like [Prunus mume]	Cluster-12337.61790	222.369	626.311	-1.4939	1.8701e-30	1.1245e-27	TRUE
		PREDICTED: pathogenesis-related protein 1A-like [Fragaria vesca subsp. vesca]	Cluster-12337.63089	724.618	1736.18	-1.2606	5.847e-59	7.255e-56	TRUE
Anthocyanins biosynthesis	CHI	PREDICTED: chalcone--flavonone isomerase 1 [Fragaria vesca subsp. vesca]	Cluster-12337.64350	343.138	1136.45	-1.7277	1.5975e-65	2.3446e-62	TRUE
		PREDICTED: probable chalcone--flavonone isomerase 3 [Fragaria vesca subsp. vesca]	Cluster-12337.67957	1096.8	2791.43	-1.3477	3.1296e-11	5.8756e-09	TRUE
		PREDICTED: probable chalcone--flavonone isomerase 3 [Fragaria vesca subsp. vesca]	Cluster-12337.68838	9843.38	23090.9	-1.2301	5.839e-125	2.6565e-121	TRUE
		PREDICTED: probable chalcone--flavonone isomerase 3 [Fragaria vesca subsp. vesca]	Cluster-12337.69818	3321.95	7050.42	-1.0857	3.4851e-92	9.1477e-89	TRUE
	CHS	chalcone synthase 1 [Jatropha curcas]>gi|643701013|gb|KDP20327.1| hypothetical protein JCGZ_06413 [Jatropha curcas]>gi|655346082|gb|AIC83903.1| chalcone synthase [Jatropha curcas]	Cluster-12337.70290	1318.39	6110.02	-2.2124	3.5434e-235	6.0455e-231	TRUE
		chalcone synthase 1 [Jatropha curcas]>gi|643701013|gb|KDP20327.1| hypothetical protein JCGZ_06413 [Jatropha curcas]>gi|655346082|gb|AIC83903.1| chalcone synthase [Jatropha curcas]	Cluster-12337.73008	2257.35	9241.63	-2.0335	0	0	TRUE
	UFGT	flavonoid 3-O-glucosyltransferase [Fragaria x ananassa]	Cluster-12337.70119	5743.51	13428.4	-1.2253	5.0111e-268	9.7709e-264	TRUE
		flavonoid 3-O-glucosyltransferase [Fragaria x ananassa]	Cluster-12337.70506	289.395	590.743	-1.0295	4.3583e-16	1.255e-13	TRUE
	ANS	PREDICTED: leucoanthocyanidin dioxygenase-like [Fragaria vesca subsp. vesca]	Cluster-12337.55736	9.90999	39.7717	-2.0048	0.00031038	0.016885	TRUE
		anthocyanidin synthase [Fragaria x ananassa]	Cluster-12337.68704	474.73	2547.6	-2.424	1.6314e-211	1.8556e-207	TRUE
		anthocyanidin synthase [Fragaria x ananassa]	Cluster-12337.69226	4375.26	10379.5	-1.2463	5.8188e-78	1.1346e-74	TRUE
		anthocyanidin synthase [Fragaria x ananassa]	Cluster-12337.70413	4906.83	11052.3	-1.1715	2.7148e-220	3.7054e-216	TRUE
		PREDICTED: leucoanthocyanidin dioxygenase-like [Fragaria vesca subsp. vesca]	Cluster-12337.72046	20.2575	84.92	-2.0676	4.8274e-08	6.0228e-06	TRUE
	F3H	flavanone 3-hydroxylase [Fragaria x ananassa]	Cluster-12337.64199	849.988	2552.1	-1.5862	1.065e-118	4.6891e-115	TRUE
		flavanone 3-hydroxylase [Fragaria x ananassa]>gi|71979912|dbj|BAE17126.1| flavanone 3-hydroxylase [Fragaria x ananassa]	Cluster-12337.80836	299.593	722.929	-1.2708	5.1337e-27	2.7587e-24	TRUE
	DFR	PREDICTED: dihydroflavonol-4-reductase-like [Fragaria vesca subsp. vesca]	Cluster-12337.34755	7.50148	36.0375	-2.2643	0.00020247	0.0117	TRUE
		dihydroflavonol 4-reductase [Fragaria vesca]	Cluster-12337.61538	306.295	993.029	-1.6969	1.6551e-56	1.9817e-53	TRUE
		PREDICTED: dihydroflavonol-4-reductase-like [Fragaria vesca subsp. vesca]	Cluster-12337.97275	24.7446	69.4615	-1.4891	0.00010245	0.0065196	TRUE
	PAL	PREDICTED: phenylalanine ammonia-lyase 1-like [Malus domestica]	Cluster-12337.57313	271.044	1240.41	-2.1942	2.4624e-101	8.4022e-98	TRUE
	4CL	PREDICTED: 4-coumarate--CoA ligase-like 7 [Fragaria vesca subsp. vesca]	Cluster-12337.67762	55.9496	130.365	-1.2204	7.7106e-06	0.00065206	TRUE
		PREDICTED: 4-coumarate--CoA ligase-like 7 [Fragaria vesca subsp. vesca]	Cluster-12337.67846	6392.88	15084.9	-1.2386	1.0111e-291	2.3e-287	TRUE
	FLS	PREDICTED: flavonol synthase 3-like [Fragaria vesca subsp. vesca]	Cluster-12337.61084	18.9738	52.2644	-1.4618	0.0011575	0.049592	TRUE
Starch, Sucrose, Glycolysis and TCA metabolism	SS	PREDICTED: granule-bound starch synthase 1, chloroplastic/amyloplastic [Fragaria vesca subsp. vesca]>gi|764641614|ref|XP_011470884.1| PREDICTED: granule-bound starch synthase 1, chloroplastic/amyloplastic [Fragaria vesca subsp. vesca]>gi|764641619|ref|XP_011470885.1| PREDICTED: granule-bound starch synthase 1, chloroplastic/amyloplastic [Fragaria vesca subsp. vesca]	Cluster-12337.71334	368.621	762.441	-1.0485	5.9124e-21	2.2861e-18	TRUE
	RFS	PREDICTED: cellulose synthase-like protein E6 [Fragaria vesca subsp. vesca]	Cluster-12337.57989	52.9958	4.04966	3.71	2.9061e-09	4.2651e-07	TRUE
		PREDICTED: probable galactinol--sucrose galactosyltransferase 6 [Fragaria vesca subsp. vesca]	Cluster-12337.69729	12027.7	5793.41	1.0539	2.8298e-193	2.5749e-189	TRUE
	ADH	PREDICTED: aldehyde dehydrogenase family 2 member B7, mitochondrial-like [Fragaria vesca subsp. vesca]	Cluster-12337.74180	1102.69	364.95	1.5953	2.6603e-20	9.9756e-18	TRUE
	UGT	PREDICTED: UDP-glycosyltransferase 74E1-like isoform X1 [Fragaria vesca subsp. vesca]	Cluster-12337.104069	40.5992	6.78092	2.5819	9.682e-06	0.00079945	TRUE
	AG	PREDICTED: alpha-glucosidase-like [Fragaria vesca subsp. vesca]	Cluster-12337.54846	133.178	65.4207	1.0255	0.00010062	0.0064203	TRUE
	BFF	PREDICTED: acid beta-fructofuranosidase-like [Fragaria vesca subsp. vesca]	Cluster-12337.65435	480.139	208.238	1.2052	1.3431e-17	4.3034e-15	TRUE
	GPA	PREDICTED: inactive glucose-1-phosphate adenylyltransferase small subunit 2, chloroplastic [Fragaria vesca subsp. vesca]	Cluster-12337.97249	18.3302	62.3286	-1.7657	0.00012409	0.0076611	TRUE
	IAM	PREDICTED: isoamylase 3, chloroplastic-like [Malus domestica]	Cluster-12337.57603	369.776	984.314	-1.4125	2.0423e-22	8.6033e-20	TRUE
		PREDICTED: isoamylase 3, chloroplastic-like [Malus domestica]	Cluster-12337.66817	464.481	1362.83	-1.5529	3.3033e-66	4.9008e-63	TRUE
		PREDICTED: isoamylase 3, chloroplastic-like [Malus domestica]	Cluster-12337.73588	1355.86	2761.71	-1.0264	1.2778e-62	1.7441e-59	TRUE
		PREDICTED: isoamylase 3, chloroplastic [Fragaria vesca subsp. vesca]	Cluster-12337.83589	18.5353	63.3832	-1.7738	2.9313e-05	0.0021591	TRUE
	TPS	PREDICTED: alpha,alpha-trehalose-phosphate synthase [UDP-forming] 1-like isoform X1 [Citrus sinensis]	Cluster-12337.88836	239.194	494.562	-1.048	2.2813e-14	5.7239e-12	TRUE
	FBA	fructose-bisphosphate aldolase [Phytophthora infestans T30-4]>gi|262106189|gb|EEY64241.1| fructose-bisphosphate aldolase [Phytophthora infestans T30-4]	Cluster-12337.125702	1.02242	19.2788	-4.237	7.3834e-05	0.0049255	TRUE
	PDX	pyruvate decarboxylase [Fragaria x ananassa]	Cluster-12337.68904	913.524	2008.6	-1.1367	1.3584e-42	1.1734e-39	TRUE
	PDH	pyruvate dehydrogenase (acetyl-transferring) E1 component, alpha subunit [Phytophthora parasitica INRA-310]>gi|566014608|gb|ETI37519.1| pyruvate dehydrogenase (acetyl-transferring) E1 component, alpha subunit [Phytophthora parasitica P1569]>gi|567952073|gb|ETK77754.1| pyruvate dehydrogenase (acetyl-transferring) E1 component, alpha subunit [Phytophthora parasitica]>gi|567980732|gb|ETL31184.1| pyr…	Cluster-12337.25847	54.8901	4.08927	3.7466	9.0814e-11	1.6182e-08	TRUE
	CS	PREDICTED: citrate synthase 4, mitochondrial isoform X2 [Tarenaya hassleriana]>gi|729354353|ref|XP_010544528.1| PREDICTED: citrate synthase 4, mitochondrial isoform X2 [Tarenaya hassleriana]	Cluster-12337.28327	43.4622	7.2044	2.5928	7.7628e-06	0.00065566	TRUE
	IDH	Isocitrate dehydrogenase [NAD] regulatory subunit 1, mitochondrial -like protein [Gossypium arboreum]	Cluster-12337.109130	23.2789	2.80361	3.0537	0.00026179	0.014582	TRUE
		isocitrate dehydrogenase, NADP-dependent, mitochondrial [Volvox carteri f. nagariensis]>gi|300257110|gb|EFJ41363.1| isocitrate dehydrogenase, NADP-dependent, mitochondrial [Volvox carteri f. nagariensis]	Cluster-12337.123074	75.8564	0.934536	6.3429	9.0976e-22	3.7289e-19	TRUE
	AH	aconitate hydratase [Chlamydomonas reinhardtii]>gi|158283690|gb|EDP09440.1| aconitate hydratase [Chlamydomonas reinhardtii]	Cluster-12337.91664	112.793	14.3296	2.9766	1.3589e-07	1.5799e-05	TRUE
	OGDH	2-oxoglutarate dehydrogenase, E2 component [Volvox carteri f. nagariensis]>gi|300263081|gb|EFJ47284.1| 2-oxoglutarate dehydrogenase, E2 component [Volvox carteri f. nagariensis]	Cluster-12337.123832	20.5835	1.86907	3.4611	0.00022599	0.012868	TRUE
		PREDICTED: 2-oxoglutarate dehydrogenase, mitochondrial-like [Beta vulgaris subsp. vulgaris]>gi|870848171|gb|KMT00460.1| hypothetical protein BVRB_9g217610 [Beta vulgaris subsp. vulgaris]	Cluster-12337.40691	82.9951	8.13893	3.3501	7.043e-14	1.6924e-11	TRUE
	SDH	succinate dehydrogenase (ubiquinone) flavoprotein subunit isoform 2 [Galdieria sulphuraria]>gi|452824339|gb|EME31342.1| succinate dehydrogenase (ubiquinone) flavoprotein subunit isoform 2 [Galdieria sulphuraria]	Cluster-12337.123502	71.2983	14.9526	2.2535	4.259e-05	0.003012	TRUE
	MDH	malate dehydrogenase [Symphyocladia latiuscula]	Cluster-12337.122607	41.0556	6.23024	2.7202	1.2022e-05	0.0009761	TRUE
		malate dehydrogenase [Symphyocladia latiuscula]	Cluster-12337.3603	78.9107	11.2144	2.8149	9.789e-11	1.7352e-08	TRUE
Ethylene synthesis	SAMS	PREDICTED: S-adenosylmethionine synthase 2 [Fragaria vesca subsp. vesca]	Cluster-12337.60475	3339.92	1633.38	1.032	2.391e-74	4.294e-71	TRUE
		PREDICTED: S-adenosylmethionine synthase 2 [Fragaria vesca subsp. vesca]	Cluster-12337.67952	4186.59	2073.14	1.014	2.0228e-56	2.4008e-53	TRUE
		PREDICTED: S-adenosylmethionine synthase 2 [Fragaria vesca subsp. vesca]	Cluster-12337.70283	4116.22	2044.78	1.0094	3.1301e-84	6.7814e-81	TRUE
	ACS	PREDICTED: 1-aminocyclopropane-1-carboxylate synthase 2 [Solanum tuberosum]	Cluster-12337.30560	104.169	21.9753	2.245	7.4424e-07	7.7073e-05	TRUE
	ACO	PREDICTED: 1-aminocyclopropane-1-carboxylate oxidase 1 [Fragaria vesca subsp. vesca]	Cluster-12337.60670	263.505	545.396	-1.0495	1.1202e-15	3.1141e-13	TRUE
